# Supplementary figures and images for: Combinatorial Identification and Differentiation of Brewing and Wild Yeast Strains Using Phenotypic and Molecular Techniques
Source: Research Square preprint supplement (doi:10.21203/rs.3.rs-6741825/v1), 2025-06-03

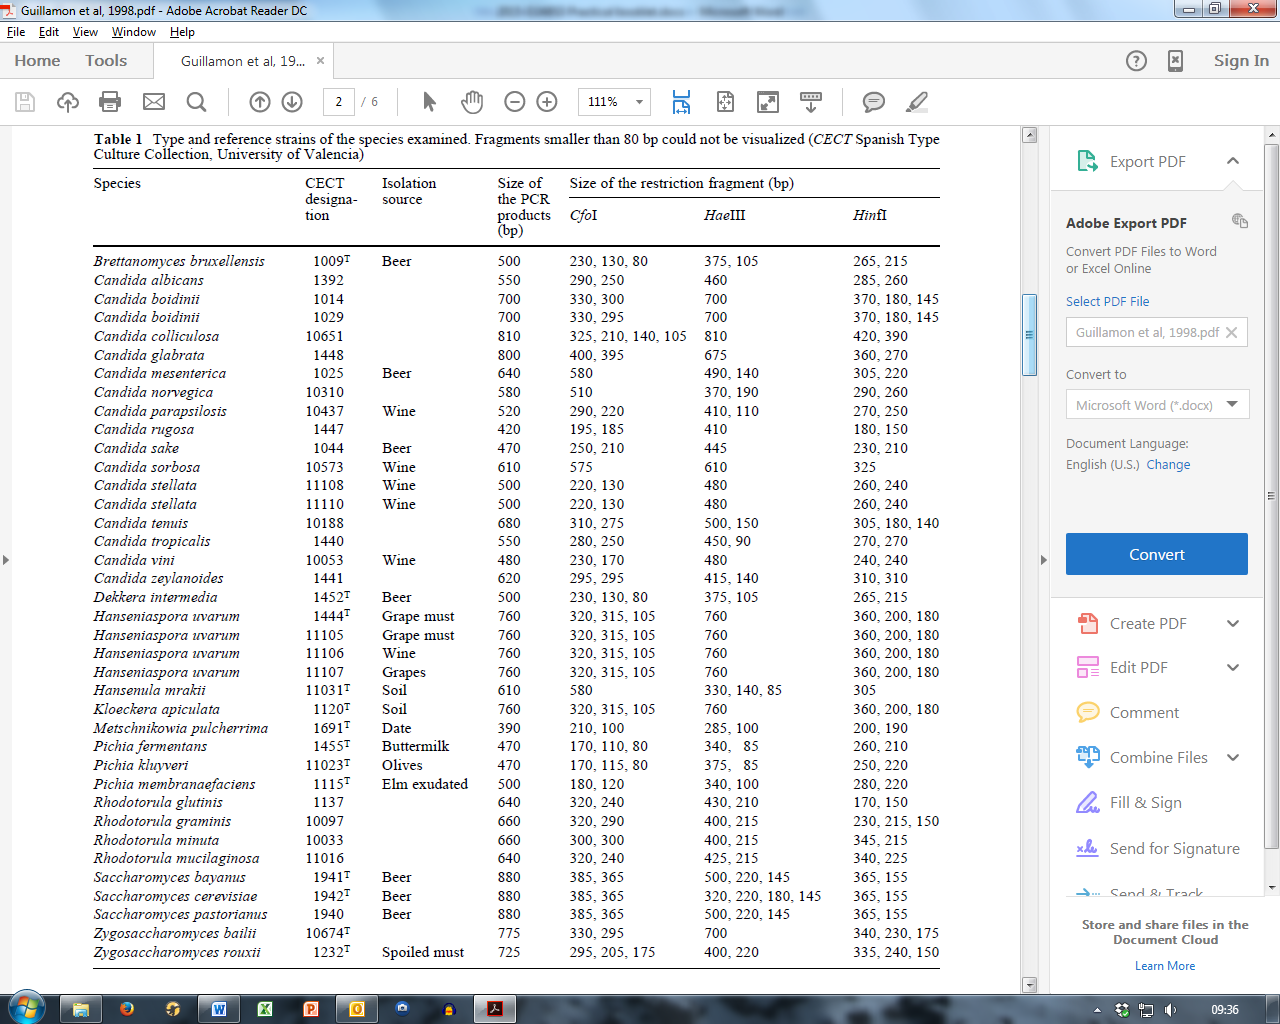


Guillamon *et al*, 1998.

Supplement: Supplementary file 1 [file d49a70d598b5c469363d8fce.docx]
